# Supplementary material for: The genome of the bowfin (Amia calva) illuminates the developmental evolution of ray-finned fishes
Source: Research Square preprint supplement (doi:10.21203/rs.3.rs-92055/v1), 2020-10-27
Supplement: Supplementary file 2 [file c695fee4ef26dd33da984ad3.xlsx]

## Sheet: Suppl. Tab. 7. Gar MHC genes.
Spotted gar gene	Location of protein coding region in ENSEMBL genome (LepOcu1)	Representative transcript	Nucleotide sequence for coding region (genomic sequence)	Nucleotide sequence for coding region (transcript sequence)	Amino acid sequence
(1) ß2 microglobulin
b2m	Exon1; LG5:3872594:3872663:-1 Exon2; LG5:3869100:3869378:-1 Exon3; LG5:3868359:3868372:-1	BLO_LOC100697190.12.16	>b2m(LG5 3872594:3872663:-1,3869100:3869378:-1,3868359:3868372:-1) ATGAAGGTCCTCTATCTAACAGCCCTGGTGGCCTTCCTCGCTTACCTCGACTCGGCGGCCGCCGCAGCAGCCGAGCCCAAGGTGCAGATCTACAGCCGGAACCCCGGGGAGTACGACAAGTCGAACACCCTGATCTGCCACGTCAGCGACTTCCATCCCCCTGACATCAAGATCGAGCTGCTGAAGAACAAGCAGCAGATGGAGGGCGTCAAGCAGAGCGACCTGGCCTTTGAGCAGGGCTGGCACTTCCACCTGACCCAGACCGTGCCCTTCACCCCCAAGAAGGGGGACATCTACTCCTGCAGGGTGTCACACAGCACCCTGTCTGTGCC…	>b2m_BLO_LOC100697190.12.16 ATGAAGGTCCTCTATCTAACAGCCCTGGTGGCCTTCCTCGCTTACCTGGACTCGGCGGCCGCCGCAGCAGCCGAGCCCAAGGTGCAGATCTACAGCCGGAACCCCGGGGAGTACGACAAGTCGAACACCCTGATCTGCCACGTCAGCGACTTCCATCCCCCTGACATCAAGATCGAGCTGCTGAAGAACAAGCAGCAGATGGAGGGCGTCAAGCAGAGCGACCTGGCCTTTGAGCAGGGCTGGCACTTCCACCTGACCCAGACCGTGCCCTTCACCCCCAAGAAGGGGGACATCTACTCCTGCAGGGTGTCACACAGCACCCTGTCTGTGCCAAAGGAGTTCACCTGGGAACCTGACATGTAA	>b2m(LG5 3872594:3872663:-1,3869100:3869378:-1,3868359:3868372:-1) MKVLYLTALVAFLAYLDSAAAAAAEPKVQIYSRNPGEYDKSNTLICHVSDFHPPDIKIELLKNKQQMEGVKQSDLAFEQGWHFHLTQTVPFTPKKGDIYSCRVSHSTLSVPKEFTWEPDM
(2) MHC class I α
mhc1zaa		BLO_ZGC_111893.1.1		>mhc1zaa_BLO_ZGC_111893.1.1 ATGACCCGCGGACCGGCCCTTCTCCTGGTCCTGGCCCTGTGCTGGCCGGCCAGCGGCGAGAGACACTCCCTGCACTATATATACACTGCCCTCTCCAAGCCTGTAGATGGCATCCCTGAGTTCACAGCTATGGGGGTGCTGAACGACAGGCAGATCGATTACTATGACAACTGGATCATGCAGAAGATTCCCAAGCAGAGCTGGATGAAGACAAACATGGGTCAGGAATACTGGGAGAAGGGAACCCAGTCCAGGAAGAGCAAGGAGCAGTGGTTCAAAGTCAACGTTGGGATTCTGATGGACCGGATGAGACAGAACAACTCTGATCTCCATATTCTCCAGTGGATGCACGGCTGTGAAATCGAGGTGCA…	>mhc1zaa_BLO_ZGC_111893.1.1 MTRGPALLLVLALCWPASGERHSLHYIYTALSKPVDGIPEFTAMGVLNDRQIDYYDNWIMQKIPKQSWMKTNMGQEYWEKGTQSRKSKEQWFKVNVGILMDRMRQNNSDLHILQWMHGCEIEVQPGSKPQFLRGYDQYSYDGRDFLSFDESKMQWVAPVWPAEPTKHKWDNEQILNQYTKGYLERECVDWLTKFLGFGEQQIKKSVPPDVHMFAKRSLTPGQLTLTCLATGFYPPDVQVDLYRDGVMLLEKDRVLSSGVRPNGAEEDTYQLRKSLEIRETDKRSYSCEVKHSSLKEPVVRQWERTVWVPPASPPSNLPIVVSVVLLVVALVAGGAALAFFAHRRKKASGSDSSGSPRSSDSDLQTNGKTIS…
mhc1zba		BLO_MHC1ZBA.1.2		>mhc1zba_BLO_MHC1ZBA.1.2 ATGATCTTGTTCTTCCTTCTTGTAGGACTTTGCCACTGCACTGCTGCTGAAAAGCACACCTATGAAGACCTTTACACAGTGAGCTCCCCATCTCAGAACATGCCAGGATTTTTTGCACTTACTCAGTTTGATGGCCTGCCTGTTATGCATTATGACAGCAATACCCACAATGCAGAATCCTTAAAAACCTGGGACACAACAAAACCCTTCAAAAGTTGCTCTGATGAGGAACACATATTCAACAGGATGCTGAAGCTAGCAGTTAGAAACATGACAGGCAACGTCCATGTGCTGCAGAGGAGGACTGGCTGTGAGCTGGAAGATGGACACACAAAGAGAGTCTTTGACCTCATCGGGCTTGACGGCGAAGACTT…	>mhc1zba_BLO_MHC1ZBA.1.2 MILFFLLVGLCHCTAAEKHTYEDLYTVSSPSQNMPGFFALTQFDGLPVMHYDSNTHNAESLKTWDTTKPFKSCSDEEHIFNRMLKLAVRNMTGNVHVLQRRTGCELEDGHTKRVFDLIGLDGEDFLSFDVNNCQWMALSPRALPVKLIWDKMRDFNKHSALYLSQICFQRISNSAEATKSLLFNASVYAFPKSALADNVSLRHRERRSPSNDRVTLTCMATGFFPRDVQLDLYRQGMKLGESGGVVSSGVRPNGDPESTYQLRKSLEIARTEAGLYYCNVTRRSESNITWFVIADHESEDPTSAALIGSIATVGVIGFITSIGILLYWKKKQERNETDTRSSTGVSLDIRNSEQAEENTSMLPNSGSGQ
mhc1paa	Exon 2; JH591468.1:12863:13123:-1 Exon 3; JH591468.1:12398:12667:-1		> mhc1paa(JH591468.1 12863:13123:-1,12398:12667:-1) AGAGCGCCTCGGCCTCCCACTGGCTGGTCTACACCTCCACAGCAGTGTCGGAGGCGGGGCTCCTCTCCCAGCTCCTGATCTCCAGGGTTCTGGACCAGCAGACGGTCTCTCACTGGGACAGCGCCTCCTGGAGAGAGACTCACACCAGCCACTGGCCCAGCAGAGCTGCCGGCCTCAGAGATGTCAACTACGAGCATGAGGAGATGGAGAACAGGGAGAGGCTGCAGGGAATCCTGAGGACGAGGAGCAACATGGGGAAAGATGTGCTCCAGAGCTGGTGAGGCTGTAGACTGGGGGATGATGGGAGTGTGGCTCTGTTTGATCACTACGGCTTCAATGGACAAGAC…
mhc1pba	Exon 1; JH591468.1:30494:30548:-1 Exon 2; JH591468.1:29351:29611:-1 Exon 4; JH591468.1:27352(preceded by undertermined residues):27624:-1 Exon 5; JH591468.1:26628:26749:-1		>mhc1pba(JH591468.1 30494:30548:-1,29351:29611:-1) ATGTGGAGTTTCTTCATCGTGTTGGGAATCTTCCTGATACCGTCTGTCGGAGAAGAGAGCGCCTCAGCCTCCCACTGGCTGGTCTACAGCTCCACAGCAGTGTCGGAGGCGGGGCTCCTTTCCCAGCTCCTGATCTCCAGGGTGCTGGACCAGCAGACGGTCTCTCACTGGGACAGCGCCTCCCGGAGAGAGACTCGCACCCGCCACTGGCCCAGTGGAGCTGCCGGCCTCAGAGACATCAACTACGAGCACGAGGAGACAGAGAACAGGGAGAGGCTGCAGGGAATCCTGAGGAAGAGGAGCAACATGGGGAAAG >mhc1pba(JH591468.1 27352:27624…		>mhc1pba(JH591468.1 30494:30548:-1,29351:29611:-1) MWSFFIVLGIFLIPSVGEESASASHWLVYSSTAVSEAGLLSQLLISRVLDQQTVSHWDSASRRETRTRHWPSGAAGLRDINYEHEETENRERLQGILRKRSNMGK >mhc1pba(JH591468.1 27352:27624:-1) SPQVFVSSKRREDTQNCSLSCLVTGFSPGVIEVSLSRAGETEGDEVWSSGLRPNGDATHQLRKSVEIRKSEIELYNCTVSHHSSNYSVTL >mhc1pba(JH591468.1 26628:26749:-1) LCSAGDGTSQWHKIALASGITVLAACLLSMIGYSLNKRTQ
mhc1pca	Exon 2; JH591468.1:44298:44558:1 Exon 3; JH591468.1:44998:45267:1 Exon 5; JH591468.1:55103:55224:1 Exon 6; JH591468.1:55413:55607:1	BLO_MHC1ZBA.2.2	>mhc1pca (JH591468.1 44298:44558:1,44998:45267:1) AGAGCGCCTCGGCCTCCCACTCGCTGGTCTACACCTCCACAGCAGTGTCGGAAGCGGGGCTCCTCTCCCAGCTCTTGATCTCCAGGGTGCTGGACCAGCAGACGGTCTCTCACTGGGACAGCACCTCCCAGAGAGAGACTCGCACCCGCCACTGGCCCAGCGGAGCTGCTGGCCTCGAAGACATCGACTATGAGCTCGAGGAGACAGAGAACAGGGAGAGGCTGCAGGGAATCCTGAGGAAGAGGAGCAACATGGGGAAAG ATGTGCTCCAGAGGTGTCGAGGCTGTAGACTGGAGGATGATGGGAGTGTGGCTCTGTTTGATCACTATGGCTTCAATGGAAAATACT…	>mhc1pca_BLO_MHC1ZBA.2.2 ATGTGGAGTTTCTTCATCGTGTTGGGAATCTTCCTGATACCGTCTGTCGGAGAAGAGAGCGCCTCGGCCTCCCACTCGCTGGTCTACACCTCCACAGCAGTGTCGGAAGCGGGGCTCCTCTCCCAGCTCTTGATCTCCAGGGTGCTGGACCAGCAGACGGTCTCTCACTGGGACAGCACCTCCCAGAGAGAGACTCGCACCCGCCACTGGCCCAGCGGAGCTGCTGGCCTCGAAGACATCGACTATGAGCTCGAGGAGACAGAGAACAGGGAGAGGCTGCAGGGAATCCTGAGGAAGAGGAGCAACATGGGGAAAGATGTGCTCCAGAGGTGTCGAGGCTGTAGACTGGAGGATGATGGGAGTGTGGCTCTGTT…	>mhc1pca_BLO_MHC1ZBA.2.2 MWSFFIVLGIFLIPSVGEESASASHSLVYTSTAVSEAGLLSQLLISRVLDQQTVSHWDSTSQRETRTRHWPSGAAGLEDIDYELEETENRERLQGILRKRSNMGKDVLQRCRGCRLEDDGSVALFDHYGFNGKYFLSFEVDNMIWRASSLQAKDTQRDWNQNRVKNQYTRFFLEIDCMETLKRFLEFREIDKNHTVSPQVFVSSKRQGDTQNCSLPCLVTGFSPGVIEVSLSRGGETEREEVWSIGLRPNGDATYQLRKSVEIRESEIEEYKCTVTHHSSNYSVTLTWGLCSAGDGTSQWHKIALASGITVLAACLLSMIGYGLNKRKQTGLSCLIVLLLTLPLSALLSSGCVFCVFQQRTGHRVFILSACSVT…
mhc1pda	Exon 6; JH591468.1:57194:57322:-1		>mhc1pda(JH591468.1 57194:57322:-1) ACTGGTCTGTCCTCCCTCGTCGTCCTGCGGGTGACTCTCCCTCTCTCTGCCCTACTGTCCTCCGGCTGTGTCTCCTGTCTCTTCCACAGAGCAGATCAGTGTGTGGCTGTGGTCCTCAGGACACGGTAA		>mhc1pda(JH591468.1 57194:57322:-1) TGLSSLVVLRVTLPLSALLSSGCVSCLFHRADQCVAVVLRTR
mhc1pea	Exon 2; JH591523.1:90796:91013(followed by undertermined residues):1 Exon 4; JH591523.1:92297:92565:1		>mhc1pea(JH591523.1 90796:91013:1) AGAGCGCCTCAGCCTCCCACTGGCTGGTCTACAGCTCCACAGCGGTGTCGGAGGCAGGGCTCCTCTCCCAGCTCCTGATCTCCAGGGTGCTGGACCAGCAGACGGTCTCTCACTGGGACAGCGCCTCCTGGAGGCTCCGCTGGCCCAGCGGAGCTGCCGGCCTCAGAGACGTCGACTACGAGCACGAGGAGACGGAGAGCAGGGAGAGGCTGAGGAAG >mhc1pea(JH591523.1 92297:92565:1) TCTCTCCTCAGGTGTTTGTCTATTCCAAGCATCTGGGAGACACACAGAGCTGTTCTCTGTCCTGTCTGGTCACTGGCTTCAGTCCTGGAGTCATAGAGGTCAGTTTGTTC…
mhc1pfa	Exon 6: JH591571.1:29209:29331:1		>mhc1pfa(JH591571.1 29209:29331:1) ACTGGACTGTCCTGCCTCTTCGTCCTGCTGGTGACTCTCCCTCTCTGCCCTGCTGTCCTCCGGCTGCGTCTCCTGTCTCTTCCACAGATCAGGTCAGTGGCTGTGGTCCCCAGGACACGGTAA		>mhc1pfa(JH591571.1 29209:29331:1) TGLSCLFVLLVTLPLCPAVLRLRLLSLPQIRSVAVVPRTR
mhc1pga	Exon 6: JH591571.1:41023:41259:-1		>mhc1pga(JH591571.1 41023:41259:-1) ACTGGACTGTCCTGCCTCATCGTCCTGCTGGTGACTCTTCCTCTCTCTGCCCTGCTGTCCTCTGGCTGCGTCTTCTGTCTCTTCCACAGAGCAGGTCAGTGTGTCTTCATACTCTCAGCCTACTCTGCAAGTGAGGAAACTCTCTGCAGCGTTCAATGTCAACAAAACAACATTTTTAGATTTCAGAATTTACATTTACAGTTTAAGTATGGCATGTTTTCCCTGCTTAACAAGTGA		>mhc1pga(JH591571.1 41023:41259:-1) TGLSCLIVLLVTLPLSALLSSGCVFCLFHRAGQCVFILSAYSASEETLCSVQCQQNNIFRFQNLHLQFKYGMFSLLNK
mhc1laa	Exon 2; JH591577.1:7656:7916:1 Exon 3; JH591577.1:9311:9577:1 Exon 4; JH591577.1:10495:10791:1 Exon 5; JH591577.1:11042:11155:1 Exon 6; JH591577.1:11372:11413:1 Exon 7; JH591577.1:11617:11660:1		>mhc1laa(JH591577.1 7656:7916:1,9311:9577:1,10495:10791:1,11042:11155:1,11372:11413:1,11617:11660:1) GGACGCACTCCATGTCCTGGTCCTTCACACTGACCCAAGAAGCCCAGTGGATCCCCAAGTTCGCAGTCGTGGGGTATCTGGATGGCCTGCCCATGGAGTACTACGACAGCACCCACGAGAGGGTCGTGTCTCGACGGCACTGGCGCCCGGACCCGGCCCCCGCGGAGAACGAGGAGGAAAAGAAAGGGGCAGCCGAACACACTTACATATCCATGTTTGAAAAACTGCAGCTCGCGAAGAAGCACTTTAACCACAGCGGAGGTCTGCACACTTACCAGAGACAGGCTGGCTGTGAGCT…		>mhc1laa(JH591577.1 7656:7916:1,9311:9577:1,10495:10791:1,11042:11155:1,11372:11413:1,11617:11660:1) THSMSWSFTLTQEAQWIPKFAVVGYLDGLPMEYYDSTHERVVSRRHWRPDPAPAENEEEKKGAAEHTYISMFEKLQLAKKHFNHSGGLHTYQRQAGCELSDDGTQLFHARDAYDGQDLLQYNMDHLRWDPLVPELKNDEALMHSDDIEQNNTYQPLCIQVLKSYLEQEKDRPVMRVKPRVQVFQKTSALSGGTEVTCLATGFYPRALELTLLRDRRPVPEQELTGGEVLPNGDGTYQLRKSLALSKEEEERRERHRYTCRVQHSGLDNMLEVAREPEPDLDTGLIAGVVIGVLIVALV…
mhc1lba	Exon 1; JH591577.1:27044:27098:1 Exon 7; JH591577.1:35471:35514:1	BLO_LOC100690338.2.6	>mhc1lba(JH591577.1 27044:27098:1) ATGCGCCTGGCGTGCGCGCTGGGCCTCCTCTGCCTGCGGGGCGCGCTCTCGGCCG >mhc1lba(JH591577.1 35471:35514:1) GAAAAGAACAGAGCGAGACGTCGTCCAACAGCTCTGGTCCCTAG	>mhc1lba_BLO_LOC100690338.2.6 ATGCGCCTGGCGTGCGCGCTGGGCCTCCTCTGCCTGCGGGGCGCGCTCTCGGCCGGCAGGCACTACCTGTGGTACCTCGGCACGCTGGTGGTGGGGAGCCCCGAGCTCCCCGAGCTGTCGGGGGTGGGCGTGGTGGACGGCGTGCAGGTGGAGTACTACAACAGCGCCGCGGGGGAGCTGGTGTCGCGGCGGGACTGGCGCCCGGGCGGGGGCGCCTTCGACGACGCCGAGGACAGGGAAGCGATCGTCCGCGACTTCCAGCGGGACATGAGGCGGAAGCTGGCGTACGTGATGGGGCGCTTCAACCACAGCGCCGGCGTCCACACGTACCAGAGGATCAGCGGCTGTGAGCTGGACGAGGGCGGGGCC…	>mhc1lba_BLO_LOC100690338.2.6 MRLACALGLLCLRGALSAGRHYLWYLGTLVVGSPELPELSGVGVVDGVQVEYYNSAAGELVSRRDWRPGGGAFDDAEDREAIVRDFQRDMRRKLAYVMGRFNHSAGVHTYQRISGCELDEGGAARFRTADAYDGQGLLTYDMERFSYSPLDPGAIYDKLFLEGYKIAVINVYQPMCLKLLKRYLEQDGHVLMRRVKPRVRVFQKTSAFSGGTEVTCLATGFYPRALELTLLRDGRPVPEQELTGGEVLPNGDGTYQLRKTLALSEEEEERRERHRYTCRVQHSGLDNGLEVDWGEDLEPDAGFIAVVVMGVLAVALVLPVAACVLRRKKGRGKEQSETSSNSSGP
mhc1lca	Exon 1; JH591577.1:56490:56541:-1 Exon 2; JH591577.1:55141:55398:-1 Exon 3; JH591577.1:53708:53974:-1 Exon 4; JH591577.1:52866:53162:-1 Exon 5; JH591577.1:52184:52297:-1 Exon 6; JH591577.1:51912:51965:-1 Exon 7; JH591577.1:51693:51736:-1	BLO_LOC100690338.6.6 (alternatively spliced form)	>mhc1lca(JH591577.1 56490:56541:-1,55141:55398:-1,53708:53974:-1,52866:53162:-1,52184:52297:-1,51912:51965:-1,51693:51736:-1) ATGAAGCCCTCCGCGCTGTTTCTTCTCTGCTGCGGCGAGCTGGCCTGGGCGGACTCTCACTCCCTGTGGTACTTCATGACCCTCACAACCGGACCGAGCCAGTTCCCGGAGTTCGTGGTTGTAGGGATGGTGGACGATGTCCAGGTGGAATACTACGACAGCGACGTCGGGAAGGTGATCTCTCGTCGACACTGGCGCCCGGACGCTGAGGTCGAGGAAGCAGACAGCAAGGTTACTGCAGCGAAGCATTACCACAACAGCATGAGAAACAAG…	>mhc1lca_BLO_LOC100690338.6.6 ATGAAGCCCTCCGCGCTGTTTCTTCTCTGCTGCTGCGAGCTGGTCTGCGCGGGCTCTCATTCCTTGTGGTACTTCGGGAGTCTACAGACAGGACAGGCCCAGTTCCCTGAGTTCGTGGTTGTAGGGATGGTGGACGATGTCCAGGTGGAATACTACGACAGTGACATCGGGAAGATGATCTCTCGACGACACTGGCGCCCGGACGCTGAGGTCGAGGAAGCAGACAACAAGGAGTCTGTAGCAAAGGATTTTTACTTCAGCATGAGAAGCAAGCTGCAGCTCCTGATGTCTCACCTGAACCACACAGGAGGACACCGGACCTACCAGAGGATCGCTGGCTGCGAGCTGGACGATGACGGTTCGGCCCGG…	>mhc1lca(JH591577.1 56490:56541:-1,55141:55398:-1,53708:53974:-1,52866:53162:-1,52184:52297:-1,51912:51965:-1,51693:51736:-1) MKPSALFLLCCGELAWADSHSLWYFMTLTTGPSQFPEFVVVGMVDDVQVEYYDSDVGKVISRRHWRPDAEVEEADSKVTAAKHYHNSMRNKLQLLMSHLNHTGGHRTYQRIAGCELDDDGSARFGRWDAYDGRDALVYNTQSYSWSLLIPQVVIDKALFQVNKIRADTFYQPLCVRVLKSYLQQERTRLMRRVKPRVRVFQKTSAFSGGTEVTCLATGFYPRALELTLLRDGRPVPEQELTGGEVLPNGDGTYQLRKSLALSEEEEERRGRHR…
mhc1lda		BLO_LOC100150607.1.1		>mhc1lda_BLO_LOC100150607.1.1 ATGAAGCCGTTTCTTGCTTTCCTGGGCTTGCTTTGTCTGAGCGGCTTCGCTCGGGCTGCCGCCCCAGCAGCCCACTCACTGTGGTACGTCAACACGCTGATCATCGGAGAGACGCAGTTCCCGGAACTGGTGACAGTGGAGATGCTGGACGGCGTCCAGCTGCGATGCTACGACAGCGACAGCAAGCGGCTGATGCTCCGCTGGCCCTGGTCCTCGGAGTCTCCCATTCTCTGGAACCTGAACCAGGATGTAGGCGTGGCGGAGGACAACCACTACTGCATGAAGAAGAAGCTGGAGGGCGCGATGTGGCAGTACAACCACACTGGAGGGGTGCACACATACCAGCGCCTGGCCGGCTGTGAGCTGCAC…	>mhc1lda_BLO_LOC100150607.1.1 MKPFLAFLGLLCLSGFARAAAPAAHSLWYVNTLIIGETQFPELVTVEMLDGVQLRCYDSDSKRLMLRWPWSSESPILWNLNQDVGVAEDNHYCMKKKLEGAMWQYNHTGGVHTYQRLAGCELHADGTKHFHSRDAYDGQDILSFDVPSNAWTALIPEGLYDRVLLETDKLMNENLLQPLCINYLKALLQEGRKDLMKRIKPRVRVFQKTSALSGGTEVTCLATGFYPRALELTLLRDGRPVPEQELTGGEVLPNGDGTYQLRKTLALSEEEEERRERHRYTCRVQHSGLDNRLDIKWGEDLEPDAGFIAVVVMGVLAVALVLPVAACVLWRKKGRGAQSPACRSSDVKYTAGQEREQSESSSNSSGP
mhc1lea*	Exon 2; AHAT01044524.1:139:396:1 Exon 3; AHAT01044524.1:925:1191:1 Exon 4; AHAT01044524.1:1809:1889 (end of scaffold):1	BLO_HA1B.1.2	>mhc1lea(AHAT01044524.1 139:396:1,925:1191:1,1809:1889:1) ACTCTCACTCCCTGTGGTACTTCCTGACTCTCACAACCGGACCGAGCCAGTTCCCGGAGTTCATGGTTGTAGGGATGGTGGACGATGTCCAGGTGGAATACTACGACAGCGACATCGGGAAGATGATCTCTCGACGACACTGGTGCCCGGACGCTGAGGTCAAGGAAGCAGACAACAAGGAGTTTGCAGTGAAGGATTTTTACTTCGGCATGAGAGACAAGCTGCAGGTCCTGATGTCTCACCTGAACCACACAGGAGGACACCGGACCTACCAGGTGATCGCTGGCTGTGAGCTGGACGATGACGGTTCGGCCCGGTTCGGTCGCTGGGACGCCTACAAT…	>mhc1lea_BLO_HA1B.1.2 ATGAAGCCCTCCGCGCTGTTTCTTCTCTGCTGCTGCGAGCTGGTCTGCGCGGGCTCTCACTCCCTGTGGTACTTCCTGACTCTCACAACCGGACCGAGCCAGTTCCCGGAGTTCGTGGTTGTAGGGATGGTGGACGATGTCCAGGTGGAATACTACGACAGCGACATCGGGAAGGTGATCTCTCGTCGACACTGGCGCCCGGACGCTGAGGTCGAGGAAGCAGACAACAAGGAGTTTGCAGCGAAGGATTTTGACTTCAGCATGAGAAACAAGCTGCAGCTCCTGATGTCTCACCTGAACCACACAGGAGGACACCGGACCTACCAGGGGATCGTCGGCTGTGAGCTGGACGATGACGGGTCGGCCCGGTTCAGTCG…	>mhc1lea_BLO_HA1B.1.2 MKPSALFLLCCCELVCAGSHSLWYFLTLTTGPSQFPEFVVVGMVDDVQVEYYDSDIGKVISRRHWRPDAEVEEADNKEFAAKDFDFSMRNKLQLLMSHLNHTGGHRTYQGIVGCELDDDGSARFSRWDAYDGRDAMNYNMKSYSWSILIPGVVMDKARLQVNKLMTDTFYQPLCVRILKSYLQQERSRLMRRVKPRVRVFQKTSALSGGTEVTCLATGFYPRALELTLLRDGRPVPEQELTGGEVLPNGDGTYQLRKTLALSEEEEERRERHRYTCRVQHSGLDNGLDIKWEPEPDLDTGLIAGVVIGVLIVALVLPVAACVLWRKKGRGAQSPACRSSDVKYTAGQEREQSESSSNSSGP
mhc1saa		BLO_LOC100698385.2.3		>mhc1saa_BLO_LOC100698385.2.3 ATGTTGCTACTGATCGTGCTCTTTGGCTGGGTTCGAACTGCGACAGGAGGGACAAATTCATTACAGTATGGCCTAACAGGGACCTTGGACCAAGCAGGCAACTTTGAGTTTGTGACCGTGGGAATGGTAAATGATATAATACTACAGTACTATGACAGCAATCAGAAGAAACTGGTGCCCCGTACGGACTGGATGAAGAATGCAGTGAGCCCGCATTTATGGGAGGGATACACAAGGCGTTTCGTCATGAAACAGGAACAAATTTATACAAATTTGAGAGCAGCCATTCAGAGATTTAATCACACTGAAGGAATCCACACTTATCAAAGGATGGCAAGGTGTGAAATGGATGCTGATGGGACCAGAAGG…	>mhc1saa_BLO_LOC100698385.2.3 MLLLIVLFGWVRTATGGTNSLQYGLTGTLDQAGNFEFVTVGMVNDIILQYYDSNQKKLVPRTDWMKNAVSPHLWEGYTRRFVMKQEQIYTNLRAAIQRFNHTEGIHTYQRMARCEMDADGTRRGFSSEAYDGNNFISFDLKTQSWNAAVPQANIIKERNELNSGHRDYLMNYYQFECFDLLKTFLKYGKEALERKEAPQVSLHMKKGVSPSEAEVMCIVTGFYPQEIAVNWVRDGNVTVEEKFFAGEVLPNGDGTYQVRSVLAVNLEDPEEHTYSCQVTHLSMTETLVVKWVQEEDQNRHFHVVTMITVVCCAFICLALLIVHCLKTSKNTKSPEHSETGSATEPLNS
mhc1haa	Exon 1; LG14:17405421:17405478:1 Exon 2; LG14:17407244:17407507:1 Exon 3; LG14:17407993:17408268:1 Exon 4; LG14:17408695:17408976:1 Exon 5; LG14:17409766:17409858:1 Exon 6; LG14:17410964:17410990:1 Exon 7; LG14:17413439:17413494:1	BLO_MHC1UXA2.3.3 (1bp insertion causing frameshift)	>mhc1haa (LG14 17405421:17405478:1,17407244:17407507:1,17407993:17408268:1,17408695:17408976:1,17409766:17409858:1,17410964:17410990:1,17413439:17413494:1) ATGCGACCTTTTTTCATCTTCATCTTTTTTCAGACTCTGACTCTTCCTGTCACTGCAGGCACATTCACTCTGCGGTATCTCTACACGGGGGTGGCCAGAGATGTGGACAGATTCAGCTTCAGTGCAGTGCTCACTTTAAACCACGTCCCCATCCTCTTCTACGACAGCCGGACTGGAAACATAGTCCCGCGCCAGGAATGGCTGAGAGAGGCATTTGACTCGGCCTTCTGGGACACCGAGAGG…	>mhc1haa_ BLO_MHC1UXA2.3.3 ATGCGACCTTTTTTCATCTTCATCTTTTTTTCAGACTCTGACTATTCCTGTCACTGCAGGCACATTCACTCTGCGGTATCTCTACACGGGGGTGGCCAGAGATGTGGACAGATTCAGCTTCAGTGCAGTGCTCACTTTAAACCATGTCCCCATCCTCTTCTACGACAGCCGGACTGGAAACATAGTCCCGCGCCAGGAATGGCTGAGAGAGGCATTTGACTCGGCCTTCTGGGACACCGAGAGGATGAGGAACAGAGAGCAGTTGATTGTTTTTGAATCCACCATGCTACTGATGATGCAGAGCTTTAATCACACCACTGCTGAGCCACACACGTACCAGCGGCTGCGGGAGTGCAAGCTGGAAGCTAATGG…	>mhc1haa(LG14 17405421:17405478:1,17407244:17407507:1,17407993:17408268:1,17408695:17408976:1,17409766:17409858:1,17410964:17410990:1,17413439:17413494:1) MRPFFIFIFFQTLTLPVTAGTFTLRYLYTGVARDVDRFSFSAVLTLNHVPILFYDSRTGNIVPRQEWLREAFDSAFWDTERMRNREQLIVFESTMLLMMQSFNHTTAEPHTYQRLRECKLEANGDVRVSDRFGYDGTDYLSLDQGTGTWIPAVPQAQSVKQKWDADTARTQECRVYLEEECIQVLKTLIRNGTGALERPVYVEVFQVEREPWEFCCLVTGISSSGAEVQWVVDQQGVLAEGQSR…
mhc1uaa	Exon 1; JH591545.1:8992:9058:-1 Exon 2: JH591545.1:8640:8879:-1 Exon 3: JH591545.1:6288:6563:-1 Exon 4: JH591545.1:5861:6202:-1 Exon 5: JH591545.1:5101:5211:-1 Exon 6: JH591545.1:4748:4815:-1 Exon 7: JH591545.1:4507:4512:-1	BLO_HA12.1.2	>mhc1uaa(JH591545.1 8992:9058:-1,8640:8879:-1,6288:6563:-1,5861:6202:-1,5101:5211:-1,4748:4815:-1,4507:4512:-1) ATGAGACGCTGGTTCCGGGTCCTGGTTCCGGCGCTGCTGCTGTGCGGGGCCCAGCTGGTCCCAGCCGTTGTCCGCTCGCTGTACTACTACGGCTGTGGGAGGCCTGGCGGTCTGGAGCAGCCGGACGTCACTGTGGTGGGGAGGCTGGATGGGGAGGAGTTCAGTTACTATGACAGCACTCAGAGGAACGTGACCCCCAGGCAGGGCTGGGTGAGGCAGCTGGAGGACCCGGAGGGCTGGAAAACGAACACGCGTGTGCTGGAAGCTTTCCTGCAGATCTACCGAAC…	>mhc1uaa_BLO_HA12.1.2 ATGAGACGCTGGTTCCGGGTCCTGGTTCCGGCGCTGCTGCTGTGCGGGGCCCAGCTGGTCCCAGCCGTTGTCCGCTCGCTGTACTACTACGGCTGTGGGAGGCCTGGCGGTCTGGAGCAGCCGGACGTCACTGTGGTGGGGAGGCTGGATGGGGAGGAGTTCAGTTACTATGACAGCACTCAGAGGAACGTGACCCCCAGGCAGGGCTGGGTGAGGCAGCTGGAGGACCCGGAGGGCTGGAAAACGAACACGCGTGTGCTGGAAGCTTTCCTGCAGATCTACCGAACAGCAGTGAGGGAGAGACAAGGCTCTCACACTGTGCTGCTGCTCTGCGGCTGTGAGCTGGAGGAGGATGGTGGGGGCACCAGTAGAGGGCG…	>mhc1uaa(JH591545.1 8992:9058:-1,8640:8879:-1,6288:6563:-1,5861:6202:-1,5101:5211:-1,4748:4815:-1,4507:4512:-1) MRRWFRVLVPALLLCGAQLVPAVVRSLYYYGCGRPGGLEQPDVTVVGRLDGEEFSYYDSTQRNVTPRQGWVRQLEDPEGWKTNTRVLEAFLQIYRTAVRERQGSHTVLLLCGCELEEDGGGTSRGRCALGHEGKVYLRLDTRTRTWTQVSRAPGAEQGWEPDRSFNRTVLTFLEQYCSQWLKIFIKHTRKTLCRAPAPEAPGLQRGREPNSPVTCSVVSLFPGDVAVSWQRDGQELTEGVDPAVVLPNGDGSFQVRRSLRVSEEELERHSFTCFVNGTSLGEELVIP…
mhc1uba	Exon 4: JH591545.1:11536:11817:-1		>mhc1uba(JH591545.1 11536:11817:-1) AGCGCCCCCTGGTGTCCCTGTCACACAAGGACTCCGGACCTGGCGGTACTGAGCTCACCTGCCTGGCCACTGGCTTCTTCCCCAGAGACATCGTGTTGTCCTGGTGGAGAGACGGACAGGAGCTGCAGGAGGATGTGGAGAGTGGGGGGGTGGTTCCCAATGGAGACGGGAGCTTCCAGGTCAGGAAGAGTCTGAGAGTGAGAGCAGGAGAGGAGGACAAGTACCAGTACTCCTGCAGAGTGGATCATACCAGCCTGGAAGAGGAGATCATCAGGATCTGGG		>mhc1uba(JH591545.1 11536:11817:-1) RPLVSLSHKDSGPGGTELTCLATGFFPRDIVLSWWRDGQELQEDVESGGVVPNGDGSFQVRKSLRVRAGEEDKYQYSCRVDHTSLEEEIIRIW
mhc1uca	Exon 2; JH591545.1:75443:75658:-1 Exon 3: JH591545.1:74295:74543:-1	BLO_MHC1UBA.2.2 (duplication of α1 and α2 domains)	>mhc1uca(JH591545.1 75443:75658:-1,74295:74543:-1) AGACTCACACCCTGATCCACGATGGCAGGGTGAGCTCACACTCCCCAGACATCACTGTGAGAGCCAAGCTGGATGACGAGGAGATCGGCTACTATGACAGCAATAAAGGAGCGACTCCTGAGCAGGACTGGGTGAAGGAGGAAAAGTACTGGGACATGAGCATCCAATCAGCCGTTCCAGTCCTCAAGACCTGCAAAGACGCTGTGAGACCAGAGGCTGAAATCCGCCAGCAGTTTGGCTGTGGGCAGAGCGATGATGGGAAAACCAGCTCATTCTGGAACATGACCTACAAGGGGCAGGATTTCACCCTGGACAGGGACTCCTGGAGCTGGACCTCCGAGGGCCAGA…	>mhc1uca_BLO_MHC1UBA.2.2 ATGTTCCGAGTCCTGGTTCTGATTATCTGTGGGGTCCAGGCTGCGTCCGCAGAGACTCACACCCTGATCCACGATGGCAGGGTGAGCTCACACTCCCCAGACATCACTGTGAGAGCCAAGCTGGATGACGAGGAGATCGGCTACTATGACAGCAATAAAGGAGCGACACCTGAGCAGGACTGGGTGAAGGAGGAAAAGTACTGGGACATGAGCATCCGATCAGCCGTTCCAGTCCTCAAGACCTGCAAAGACGCTGTGAGACCAGAGGCTGAAATCCGCCAGCAGTTTGGCTGTGGGCAGAGCGATGATGGGAAAACCAGCTCATTCTGGAACATGACCTACAAGGGGCAGGATTTCACCCTGGACAGGGACTC…	>mhc1uca_BLO_MHC1UBA.2.2 MFRVLVLIICGVQAASAETHTLIHDGRVSSHSPDITVRAKLDDEEIGYYDSNKGATPEQDWVKEEKYWDMSIRSAVPVLKTCKDAVRPEAEIRQQFGCGQSDDGKTSSFWNMTYKGQDFTLDRDSWSWTSEGRIPSDLPPEPNRRRVEQVLDQVCPECLKTLTRRRRAAVDKGEGANQRSHSPVTHSWRAFYTGTTGLDGFPEFVSVGVVDDVQVGYFDSKIGRLVHRQKWMEQHLGQEYLKLYTDVLKGTQENFKANVKILMERFNQTGGVHTWQQMYGCELDDDGTTRGFWQYGYDGADYISLDKSTLTWTAANQRGMTTKLKWDPDRAWTQQTKAYLENTCIEWLKKYVGYGRETLLRTERPQVSVSHKDS…
mhc1uda	Exon 2; JH591545.1:72868:73128:-1 Exon 3; JH591545.1:64254:64529:-1 Exon 4; JH591545.1:63473(preceded by undertermined residues):63721:-1		>mhc1uda(JH591545.1 72868:73128:-1,64254:64529:-1,63473:63721:-1) GAACTCACTCGTACCAGTACATCTATACTGCAACTGTGGGAATGAGTGAATTCCCAGAGTTTGTGGTAGTGGGAATGGTGGATGGGGAGCAGGTGAACTACTACGACAGCAGTATCAAGGAGATGATTCCTCGACGGGAGTGGGTGAAGGGAGCAGTGGACCCCGACTTCTGGAACAGGGGCACACAGATTCTACTTGGCTGGCAGCAGACTTTCAAGGCTGGTATCGAAATTCTAAGGCAACGCTTCAACCAGACTGGAGGAGTCCACACGTGGCAGCTGATGTACGGCTGTGAGCTGGACAGTGACGGCACCACTCGGGGGTATTTTCAGT…		>mhc1uda(JH591545.1 72868:73128:-1,64254:64529:-1,63473:63721:-1) THSYQYIYTATVGMSEFPEFVVVGMVDGEQVNYYDSSIKEMIPRREWVKGAVDPDFWNRGTQILLGWQQTFKAGIEILRQRFNQTGGVHTWQLMYGCELDSDGTTRGYFQFGYDGADYISLDKSTLTWTAANQRAVITKNKWDATGADARFQTNYLENTCIEWVKKYVEYGRETLLRTERPQVSVYSRVSGSQGPEVTCLATGFFPKDIVVHLQRDGQDLQEDVHSGEVLPNGDGSFQVRKSLRVSEEELKRHQYSCRVDH
mhc1ufa	Exon 1; JH591501.1:24217:24254:-1 (frameshift) Exon 2; JH591501.1:17401:17661:-1 Exon 3; JH591501.1:13292:13570:-1 Exon 4; JH591501.1:11909:12184:-1 Exon 5; JH591501.1:11548:11652:-1		>mhc1ufa(JH591501.1 24217:24254:-1,17401:17661:-1,13292:13570:-1,11909:12184:-1,11548:11652:-1) ATGCTGCCGCTGTTGCTGTGCGCACTCGTCCTGGGCTGTCACCCACTCCCTGCGCTACTTCTACACCGGGGTCACTGGGGTCAGGGGGTTCCCCGAGTTCACCATCGTGGGCCTGGTGGACGGGCAGGAGTTTGTCCACTACGACAGCGACATCAAGAGGATGATTCCCAAGACGGAGTGGATAGAGAGGAACGAGGGGAAGGACTACTGGGACAGACAGACTCAGATACTGATTGGTGCATCACAGGTTTTCAAAACAGATTTAGTTAACCTGCCACAGCGTTTCAACCAGTCTGCAGGCGT…		>mhc1ufa(JH591501.1 17401:17661:-1,13292:13570:-1,11909:12184:-1,11548:11652:-1) THSLRYFYTGVTGVRGFPEFTIVGLVDGQEFVHYDSDIKRMIPKTEWIERNEGKDYWDRQTQILIGASQVFKTDLVNLPQRFNQSAGVHTSQSMYGCEWDDEDGTTRGFQQEGYDGEDYLVFDLKTLTWVAPTQRAFLTKQNWDADRAFNEGKKNYLTQICIEWLKKYVNYGRETLNRRERPQVSVFHKDSGSGSTELTCLATGFFPRDILVSWWRDGQELHEDVDSGEVVPNGDGSFQVRKRLRVRAGEEHKYSCRVDHTSLEKTIVQHWEPPSLVPIIAAVCAVVALAVIAVVAVVLVRRRKSS
mhc1uea	Exon 2; JH591750.1:9142:9405:-1 Exon 4; JH591750.1:2840:3118:-1 Exon 5; JH591750.1:2222:2332:-1 Exon 6; JH591750.1:515:547:-1 Exon 7; JH591750.1:303:343:-1		>mhc1uea(JH591750.1 9142:9405:-1) TGACTCATTCCCTGAGGTATTTCCACACGGGATTCACAGGAGTCCCAGGTTTTCCCGAGTTTGTGGCCGTGGGGATGGTTGACGATGAGCAGATTGACTATTACGACAGCGTAACCCAGAAGGATGTGCCCAAACAGCAGTGGATGAAAGATCACATGGATGCCTCCTACTGGGAAAGACAGACACAGAAAAGATTTGGATGGCAGCAGGGAAGCAATAAATATGCTTTGGAAGAACTACCAAAGAGGTTTAACCAGACAGACA >mhc1uea(JH591750.1 2840:3118:-1,2222:2332:-1,515:547:-1,303:343:-1) AGCGCCCCCAGGTGTCTGTGTTCCACAAGGA…		>mhc1uea(JH591750.1 9142:9405:-1) THSLRYFHTGFTGVPGFPEFVAVGMVDDEQIDYYDSVTQKDVPKQQWMKDHMDASYWERQTQKRFGWQQGSNKYALEELPKRFNQTD >mhc1uea(JH591750.1 2840:3118:-1,2222:2332:-1,515:547:-1,303:343:-1) RPQVSVFHKDSRSGGTELTCLATGFFPRDILVSWLRDGQELQEDVDSGEVLPNGDGSFQVRKSLRVRAGEEDKYSCRVDHKSLSPGDILMPWEPPSSSLVPIIAAVCAVVALAVIAVVAVVLVRRRKSSGGQKPIYRQAAGKEPGDSSSNSSA
(3) MHC class II α
mhc2dla	Exon 1; JH591501.1:64610:64673:1 Exon 2; JH591501.1:64758:65012:1 Exon 3; JH591501.1:65597:65878:1 Exon 4; JH591501.1:66558:66685:1	BLO_LOC101348755.1.1	>mhc2dla(JH591501.1 64610:64673:1,64758:65012:1,65597:65878:1,66558:66685:1) ATGTCTGTGGGCTGGAAATGTCTTGGGCTGTTGGTGGTGATGCAGGGAGCTGCCACTGTTGCTGTTGAACACACCTACGAGGTGGCATATTTCTGCCAAAGTGAAAATCGAAAAGGATCCCGCAATGAAGTGTTTGACGACGATGAAATGTTTCACATCGACCCCGATCGGAAGGTGGACGAGCCCCGTCTCCCCGAGTTTGAGAAGTGGGCCTGGAACGACTCGAGCTTGATTCAGGGTGCACTGGCTAACCTGGGCATTTGTGAAAACCACCTGAAGGGTGTTATGAAAGCTATTCCTGATGAACCTGCTGTGAAGGTCC…	>mhc2dla_BLO_LOC101348755.1.1 ATGTCTGTGGGCTGGAAATGTCTTGGGCTGTTGGTGGTGATGCAGGGAGCTGCCACTGTTGCTGTTGAACACACCTACGAGGAGGTATTTTTCTGCCAAAGTGAAAATCGAAAAGGATCCCGCAATGACGTGTTTGACGACGATGAAATGTTTCACATCGACCCCGATCGGAAGGTGGACGAGCCCCGTCTCCCCGAGTTTGAGAAGTGGGCCTGGAACGACTCGAGCACGATTCAGGGTGCACTGGCTAACCTGGGCATTTGTGAAGACCACCTGAAGGGTGTTATGAAAGCTGTTCCTGATGAACCTGCTGTGAAGGTCCCCCCGAAGCCAGCTGTGTTCCCCGAGGAGCCCGTGGAGCTCGGCTGG…	>mhc2dla(JH591501.1 64610:64673:1,64758:65012:1,65597:65878:1,66558:66685:1) MSVGWKCLGLLVVMQGAATVAVEHTYEVAYFCQSENRKGSRNEVFDDDEMFHIDPDRKVDEPRLPEFEKWAWNDSSLIQGALANLGICENHLKGVMKAIPDEPAVKVPPKPAVFPEEPVELGWPNTLICALNDFTPPTAQLRWLKNGQPVTSDVSSTDYIPLSSNKFAMFSYLSFTPQEGDIYTCHVEHTALSEPVSVFWDAEVPTDSDASETAFCAIGLALGILGVVLGTVFLIKAIKFHS
mhc2dga1	Exon 2; JH591501.1:83783:84037:1 Exon 3; JH591501.1:84350:84631:1		>mhc2dga1(JH591501.1 JH591501.1:83783:84037:1,84350:84631:1) CTTCACACATTGACATAAATGTCATTGGCTGCAAGTCGGATGACCCAGTGGCACAAGATGAGGCTCAGCTGGACGGAGACGAGATGTTTTATGCCGATTTTGACAAGAAGGAAATGATACTGACACTGCCGGCGTTTGCTGACTCCTTTGGTGTAGATCCAGGATGGGTACAGGGCGCAATAGCAAATCGACAGATCTGCATCAACAATTTGGAAGTTGCTATCAAAGCTGAGAACAACCCTCCAGAAAACACAGATGCTCCTGTCAACACTATCTACCCCAGGGATGAAGTGGAGCTCGGGAAGCCCAACACCCTCATCTGTCTTGCCAACAACTTT…		>mhc2dga1(JH591501.1 JH591501.1:83783:84037:1,84350:84631:1) SHIDINVIGCKSDDPVAQDEAQLDGDEMFYADFDKKEMILTLPAFADSFGVDPGWVQGAIANRQICINNLEVAIKAENNPPENTDAPVNTIYPRDEVELGKPNTLICLANNFFPPPVKVRWTKNDVDVSEQATLSRYYPNSDATFYQFSTLSFTPQLGDVYSCSVEHKALPEPKTRIW
mhc2dha1	Exon 3; JH591501.1:124439:124720:1 Exon 4; JH591501.1:125147:125277:1	BLO_LOC100702693.4.7	>mhc2dha1(JH591501.1 124439:124720:1,125147:125277:1) ATGCGCCTACTGCGATGGTGTACCCCAGAGACAGCGTCGAGCTGGGGAAGCCCAACACGCTCATCTGCTCCGTCACGGACTTCCACCCGATGGGTATCGGGGTGACCTGGACCCACAACGACAGGCCAGTCACCGAGGGCGTCACCCAGACCACACCGCTCTCTGGGAGAGACTTCAGCTTCAAGGTCTTCTCCTTCCTGCCCTTCACACCCCGGCTGGGCGACGTCTACTCCTGCCAGGTGCAGCACAGCGCCCTGCCCGAGCCCCTCGCCAGACTCTGGGAGGTGGAGACGGAGACGGGGACAGAGTCTGACATCGGGCCGACAGCGTTCTGCGTGGCGGGCC…	>mhc2dha1_BLO_LOC100702693.4.7 ATGGTTCTAGGTGTGTTTCTGGCAGCTGCCTGGTGTGGGGTTCGTGCTAATGTTCTGCATCGTGGCTTCCTTTTAACTGCCTGCCAGTCCAACGTCACTAGAACTTTAAGTGAGTTGCAGCTGGATGGGGAAGGGGTCGCCTACATGGATTTTGACCGGGAAGAGATGGTCATGACGCTCCCACAGTTCGCAGACCCCATCAGCCCTGGTGGGGAGGGGGTGACGCTGGCCCTGGGTTGCAGGGAGCTCTGCAGAAACAGCCTGATGGAAGTGGCAAAGGCCGAAGGATACCCTCCGGAGAGGAAGGATGCGCCTACTGCGATGGTGTACCCCAGAGACAGCGTCGAGCTGGGGAAGCCCAACACGCT…	>mhc2dha1_BLO_LOC100702693.4.7 MVLGVFLAAAWCGVRANVLHRGFLLTACQSNVTRTLSELQLDGEGVAYMDFDREEMVMTLPQFADPISPGGEGVTLALGCRELCRNSLMEVAKAEGYPPERKDAPTAMVYPRDSVELGKPNTLICSVTEFHPMGIGVTWTHNDRPVTEGVTQTTPLSGRDFSFKVFSFLPFTPRLGDVYSCQVQHSALPEPLARLWEVETETGTESDIGPTAFCVAGLTLGLLGVAAGTFFLIKGSSCN
mhc2dha2		BLO_LOC100702693.1.7		>mhc2dha2_BLO_LOC100702693.1.7 ATGAAGACCTGCGCCTGGCCAGCTCTGGTCCTGGCAGCGCTGTCCCTGTCTGTTCAGGCTCAGGTGCTGCACCGGGCGGTGGACCTGACCGCCTGCCTGTCCAACGACACGGAGTCGCAGGCGCTGGGCCAGCTGGACGGGGACCAGATGTTCTTCGTGGACCTGGAGCTGCGGCAGGCCGTCCTCACGCTGCCCCCCTTCGCTGACCCCTTCGCCCTGGGGCCGGACTCTGTGGCCCAGGCGCTGGCCAGCAGGCAGCTCTGCAGGAACAACCTGGCCACCGCCGCCCGCGCTGAGGGCTTCCCGCCAGAGACCGCCGAGCCCCCCGTGGCCATGGTGTACCCCAAGAGCGTGGTGCGGCCGGGGGA…	>mhc2dha2_BLO_LOC100702693.1.7 MKTCAWPALVLAALSLSVQAQVLHRAVDLTACLSNDTESQALGQLDGDQMFFVDLELRQAVLTLPPFADPFALGPDSVAQALASRQLCRNNLATAARAEGFPPETAEPPVAMVYPKSVVRPGEPNTLICSAQRYYPFPLGLAWARNGEPVAGTTPQTLSLVRRDATYSCYSLLLFSPRPGDVYTCHLQHRALRRPLVVAWEVPPEARPGAVLTVVCGVAMALGMLGVVTGCLLFCVSS
mhc2dea	Exon 2; JH591615.1:7070:7318:1 Exon 3; JH591615.1:7739:8020:1 Exon 4; JH591615.1:9032:9156:1		>mhc2dea_(JH591615.1 7070:7318:1,7739:8020:1,9032:9156:1) TTAGACATCTAGACCGACTTTTGACGTTCTGCGTGTCTAATTCCACCGAAGCGGAGCTTGAGAAAGAGCACGATGAAGATGAGATATTTTATGTTGATCTGGAGACAAAGCAGTCGGTACAGAGGCTCCCAGAGTTTGCAGAGAAATGGCACGTAGGCCCAGAATGGCCTCCATTTGCACAGCAGGAAGTAGAAACCTGCCGACTCTATCTGGCAGCTAAAGGAGAAGGATTCCCTGAAGAGAAACTAGATCCCCCGATTTCCCGATTGTACTCGGAGAACGAGGTGGAGCTGGGGGTCCCCAACGCTCTGATCTGCTTCATCACTGACTTCCACCCTGCA…		>mhc2dea(JH591615.1 7070:7318:1,7739:8020:1,9032:9156:1) RHLDRLLTFCVSNSTEAELEKEHDEDEIFYVDLETKQSVQRLPEFAEKWHVGPEWPPFAQQEVETCRLYLAAKGEGFPEEKLDPPISRLYSENEVELGVPNALICFITDFHPAPVKVSWTRNTEPVTQGFNVTQYYSNKDYSLRLFSYLSFTPQAGDVYSCSVEHRALQEPLTRLWEVEVQSDSEAAETAVCGVGLTLGLLGVAAGTFFLIKGNKCN
mhc2dga2		BLO_LOC100691970.1.3		>mhc2dga2_BLO_LOC100691970.1.3 ATGAAGTTCGCTGTCTGTGTTACTGTGCTGCTGGGATCGGTGTGTGCAGTAGCTCTTGCTCAGCATCTGGACTTGTATCTTATTGGCTGTGACAAAACTGAATCAGAAGACGCAAAAGAGCTGGATGGTGATGAGATTAAATACATGGACTTCAACCAGAATAAAGTAGTTATGACACTCCCGGATTTTGCTGAGCCGTTTGGATCAGCTCCAGGATGGGAACAACAAGCACTGGCTGAAAGGGCCACTTGTAGAAATAACCTGGATGTTGCCATAAAAGCTGAAAACAACCCCCCTGAGGAAATAGATCCTCCTGTCAACACAGTGTATCCTAGGGACGATGTGGAAGTCGGTAAGCCCAACACCCT…	>mhc2dga2_BLO_LOC100691970.1.3 MKFAVCVTVLLGSVCAVALAQHLDLYLIGCDKTESEDAKELDGDEIKYMDFNQNKVVMTLPDFAEPFGSAPGWEQQALAERATCRNNLDVAIKAENNPPEEIDPPVNTVYPRDDVEVGKPNTLICFVNNFYPPPIKVKWTRNDKEVKEGVTLGRYFPNSDFTFRQFSMLSFTPQEGDVYSCTVEHQGLTEPMTRIWEPEIKTESDIGPTAFCGVGLTLGLLGVAAGTFFLIKGNNCN
(4) MHC class II ß
mhc2dlb	Exon 1; JH591501.1:70640:70697:1 Exon 2; JH591501.1:71064:71336:1 Exon 3; JH591501.1:72010:72291:1 Exon 4; JH591501.1:72852:72965:1 Exon 5; JH591501.1:74194:74225:1	BLO_ZGC_123077.1.1	>mhc2dlb(JH591501.1 70640:70697:1,71064:71336:1,72010:72291:1,72852:72965:1,74194:74225:1) ATGAGACTGGTGCTTCTCTGCTCGGCGTTGGTACTTTGTCTAACCCTGTCCGGGGCCGATGACTTCGTGTACTTCTTTAGGAGCGAGTGTCACTTCAGCGCCAGTGACCTGCGGGACCTGGTCTATGTCCGTTCAATGACTTTCAACGGGAAGGAGCGCGTGAGGTTCAACTCCACGGTGGGCAAATACGTGGGGTTCGACACCTGGGGAGAGAAGCAGGCCAACTACTGGAACGGACAGAAGGACTACATTGCAAGGCTAAGTGCGGATAAAGACCGATTTTGCAAGTACAATGTTCAACTCATGGC…	>mhc2dlb_BLO_ZGC_123077.1.1 ATGAGACTGGTGCTTCTCTGCTCGGCGTTGGTACTTTGTCTAACCCTGTCCGGGGCCGATGACTTCGTGTACCTTATTAGGGGCGAGTGTCACTTCAGCGCCAGTGACCTGCGGGACCTGGTCTATGTCCGTTCAATGACTTTCAACGGGAAGGAGCGCGTGAGGTTCAACTCCACGGTGGGCAAATACGTGGGGTTCGACACCTGGGGAGAGAAGCAGGCCAACTACTGGAACGGACAGAAGGACTACATTGCAAGGCTAAGTGCGGATAAAGACCGATTTTGCAAGTACAATGTTCAACTCATGGCAAGCGGGATGCAGGACAGAAAGATCAAGCCTGAGGTGAAGATCTACCCCGCCAAGACGGCCAG…	>mhc2dlb(JH591501.1 70640:70697:1,71064:71336:1,72010:72291:1,72852:72965:1,74194:74225:1) MRLVLLCSALVLCLTLSGADDFVYFFRSECHFSASDLRDLVYVRSMTFNGKERVRFNSTVGKYVGFDTWGEKQANYWNGQKDYIARLSADKDRFCKYNVQLMASGMQDRKIKPEVKIYPAKTASQGHTHMLVCHAHGFYPRQIAVSWLRNGQPVSSDLTSMSFASDGDWTYQTLLYLEFTPQGGETFECAVDHVALDGTLKLRWDPAAREAKRNKVIMGASGLVLGLVFAVIGVVYWKRKTKGHIAVPTVQS
mhc2dgb	Exon 3; JH591501.1:95827:96108:1 Exon 4; JH591501.1:96578:96691:1 Exon 5; JH591501.1:98568:98596:1	BLO_ONCMYK-DBB.1.6	>mhc2dgb(JH591501.1 95827:96108:1,96578:96691:1,:98568:98596:1) CGGAGCCCGACGTCCGGCTGAGTTCCACCAAGCCCTCCTCTCAGAAGCACCCCGCCATGCTGATGTGCAGCGCCCTCGGCTTCTACCCCAAACAGATCAAGGTGTCCTGGCTGAGGGACGGGCAGACGGTGACCTCGGACGTGACCTCCACCGAGGAGCTGGCGGACGGAGACTGGTACTACCAGATCCACTCCCACCTGGAGTACACGCCCCGGGCAGGAGAGAGCATCGTGTGCAGGGTGGAGCACAGCAGCTTTGCCACGCCCAAGGAGCTGACCTGGGACCCCTCGATGCCCGAGGCTGACCGGAACAAGATCATCATCGGGGCGTCCGGT…	>mhc2dgb_ BLO_ONCMYK-DBB.1.6 ATGGTTTCCTCGAGCCCCTGCTGGGCGAGTCTGCTGGTGCTGCTGCTGGCGGCGCTGGGGTGCGGAGCAGAGGATTATTTCTATCATGTACAGCGGGAGTGTCGCTTCAGCTCGAAGGCCCTGGGGGACCTGGAGTTCATTGACAGATACGTCTTCAACAAGCTGGAGCTCCTCCGCTACAACAGCACTCTGAACAAGTACATAGGGTACACTGAGCTGGGAGTGAGGAATGCAGAGCGATGGAACAACGACCCAGCTCAACTGGCAGGACAGCTTGGTAACCGGGATCAGTACTGCAAGCACAACGCTGAGCTCTCCTACCAGACCATCCTGGACAAGACAGTGGAGCCCGACGTCAAGCTGAGGTCCG…	>mhc2dgb_BLO_ONCMYK-DBB.1.6 MVSSSPCWASLLVLLLAALGCGAEDYFYHVQRECRFSSKALGDLEFIDRYVFNKLELLRYNSTLNKYIGYTELGVRNAERWNNDPAQLAGQLGNRDQYCKHNAELSYQTILDKTVEPDVKLRSAKPSSQKHPAMLVCSALGFYPRQIKVSWLRDGQTVTSDVTSTEELADGDWYYQIHSHLEYTPRAGESIVCRVEHSSFATPKELTWDPSMPEADRNKIIIGASGLVLGLVIAAAGGIYYKKKSGVRRMLVPTS
mhc2dkb		BLO_LOC100701969.1.1		>mhc2dkb_BLO_LOC100701969.1.1 ATGTGGGCTCAACAGGCCCTGTGCCGTCTCCAGCTGCTGGCTGTGTTTTCAGGGTTCCACTGGGGCCACGGAGATCACTGTGGAGTGGAGGGACATGTCTACCAGTTTTCAGGTTCGTGTCAGTTCAGTTCGAGGAGCCCGGATGACGTCGTCTACGTTGAGAGTTATGTCTTTGAGAGAAAGGAGTTGATTCACTATGACAGCCGGGCGGGTCAGTTTGTGGGGTACACTGAGTACGGGGCGAAGGTCGCAGAGAGGTGGAACAGCGATCCGCAGTCGAAGGCGAGAGTGGTGACTATCAGGAACACCTTCTGCAAACCCAATCTTGAGCTCGCCTACGACCATATCCTGGAGAAGACAGTGGCGCCC…	>mhc2dkb_BLO_LOC100701969.1.1 MWAQQALCRLQLLAVFSGFHWGHGDHCGVEGHVYQFSGSCQFSSRSPDDVVYVESYVFERKELIHYDSRAGQFVGYTEYGAKVAERWNSDPQSKARVVTIRNTFCKPNLELAYDHILEKTVAPSVRISQGRLGGPGQPTTLACHVLGFYPQLVNVTWLRGRAPVTRDVTSTGLLADGDWHYQTHTYLELVPRPGETLACRVEHSGLRAPLEITWEPPAPGSQRNQIVIGASGLVLGLSLALAGGLYYRKKSTGTARRARRRFPEGDRRRTRERTAVWSSPLSLTGRRRRPMGRTV
mhc2dnb		BLO_ZGC_123107.3.4		>mhc2dnb_BLO_ZGC_123107.3.4 ATGTCTCCTGTCCTCGTCTCTCTCTGGGTCCAGCTGCTGGTCGGGGGACCCTGGGGCCGCCCTGGAGTGGAGGGATACGCCTACGAGTCGCTGGAGATCTGCGAGTTCGACCCCAGTAACCTCACCGGGCTGGTCTACATCAACAGCCAGGTCTTCAACAGGCTGGAGTACCTCCGCTACGACAGCAGGGTGCAGCGGTTCGAGGGGTACACCCGCTTCGGCATCGCGAACGCCCAGAGGTTCAACAGGGATCCCGGCGTCATGGCGACCATGCTGGCCAACCGGGACCACTACTGTGTGCCCAACGCCAGGCTGTTCAACAGCTCCATCCTGAACAAGACGGTGGCGCCGGCGGTGAGCATCACGGCGCT…	>mhc2dnb_BLO_ZGC_123107.3.4 MSPVLVSLWVQLLVGGPWGRPGVEGYAYESLEICEFDPSNLTGLVYINSQVFNRLEYLRYDSRVQRFEGYTRFGIANAQRFNRDPGVMATMLANRDHYCVPNARLFNSSILNKTVAPAVSITALGGGADGSLVLVCHATGFYPPRISVTWLRGGGAAPGGSSGLLPDGDWLYQTHAFLEPGPRPAEQLSCIVEHRSLAQPLVVPWEPPTAPPDWRLVATALWALSLGLVLSLAGAASRWGRSSKQTGGRVAARIAAVLKGRLRPAALGAW
mhc2deb	Exon 2; JH591615.1:11956:12225:1 Exon 3; JH591615.1:14736:15017:1 Exon 4; JH591615.1:15636:15749:1 Exon 5; JH591615.1:16165:16190:1		>mhc2deb(JH591615.1 11956:12225:1,14736:15017:1,15636:15749:1,16165:16190:1) ATGGGAATATGTACCAGTTCGTTCATGACTGTGAGTACAATGATCATCTGGAGGATTTTCTCTACACAAGGAGGGACATTTTTAACAAGATTGAGATTTTGCGTTATGACTCGAATATCCAGACGTTTGTTGGCTACACACCACTTGGGATCAAATATGCAGAGAGATTCAACCAGGATAAAGAATACCTAGCAGGACTCAAGGATGACCTGGATAATTATTGTAAACACAACGCAGGGGTCTACAAGAGCACCATGACGGACAGGAAGGTTCCCCCCTCGGTCAAGGTGAGCGCCACCAAGCTGCTCAGCTCCAAGCACCC…		>mhc2deb(JH591615.1 11956:12225:1,14736:15017:1,15636:15749:1,16165:16190:1) GNMYQFVHDCEYNDHLEDFLYTRRDIFNKIEILRYDSNIQTFVGYTPLGIKYAERFNQDKEYLAGLKDDLDNYCKHNAGVYKSTMTDRKVPPSVKVSATKLLSSKHPTMLVCHVTGFYPQRITVTWLRDGLEIKTDVTSTDLLANGDWTYQVHSHLELTPRAGETVACRVEHSSLERPLEVTWDPSMPESKKNKIVIGVSGLILGLIITAAGVIYYKKKSSGRILVPSD
*The gene found on the scaffold AHAT01044524.1 is tentatively name as Leoc-mhc1lea. The scaffold is short and it remains possible that it can be an allele of mhc1lca locus, whose nucleotide sequence is similar to one of mhc1lea.
